# Supplementary material
Source: publisher figshare collection journal article supplement (https://gsajournals.figshare.com/ndownloader/files/30867571)
Supplement: Supplementary file 1 [file 30867571]

**Supplementary Table 3:** Number of individual table beet roots per F2:3 table beet family represented in the selected population of high and low geosmin individuals (n = 44 and n = 43, respectively).

| **Number of individuals per family in selected population** | | | | |  |  |  |
| --- | --- | --- | --- | --- | --- | --- | --- |
| Individual Frequency | 1 | 2 | 3 | 4 | 5 | 6 | Total Families |
| Families | 5 | 2 | 4 | 3 | 6 | 4 | 24 |
